# Supplementary material for: Investigation of Intense Precipitation from Tropical Cyclones during the 21st Century by Dynamical Downscaling of CCSM4 RCP 4.5
Source: MDPI journal article supplement (doi:10.3390/ijerph16050687), 2019-02-26
Supplement: s1 [file s1]

This supplementary document provides the list of the historical landfalling tropical cyclones (TCs) during 2005-2017. TCs were determined by visual examination of TC tracks provided by the free online encyclopedia *Wikipedia* (by checking if these tracks passed over the conterminous U.S.), whereas the dates and times of landfall and termination were obtained from the Tropical Cyclones Reports of the National Hurricane Center. In Section 6 of the article, four intense precipitation (IP) metrics are computed for each of these TCs using the Stage IV observation dataset (Lin and Mitchell, 2005), and their statistics are compared with those corresponding to the TCs simulated by the WRF model during 2005-2017, the objective being to check if the WRF model produced realistic IP during the historical period.

Table 1: List of the historical landfalling TCs with strength  $\geq$  TS during 2005-2017 with the dates and times of their formation, termination and first landfall in the conterminous U.S. This list was created by examining TC tracks obtained from the free online encyclopedia *Wikipedia* and by checking if these tracks passed over the conterminous U.S. Dates and times of formation, termination and landfall were then obtained from the Tropical Cyclones Reports of the National Hurricane Center (<https://www.nhc.noaa.gov/data/tcr/>; last accessed on 02/19/2019).

| Name               | Year | Formed      | Ended       | Landfall    |
|--------------------|------|-------------|-------------|-------------|
| TS Arlene          | 2005 | 06/08 18:00 | 06/14 12:00 | 06/11 19:00 |
| Hurricane Cindy    | 2005 | 07/03 18:00 | 07/11 12:00 | 07/06 03:00 |
| Hurricane Dennis   | 2005 | 07/04 18:00 | 07/18 12:00 | 07/10 19:30 |
| Hurricane Katrina  | 2005 | 08/23 18:00 | 08/31 12:00 | 08/25 22:30 |
| Hurricane Rita     | 2005 | 09/18 00:00 | 09/26 06:00 | 09/24 07:40 |
| TS Tammy           | 2005 | 10/05 06:00 | 10/07 06:00 | 10/05 23:00 |
| Hurricane Wilma    | 2005 | 10/15 18:00 | 10/27 00:00 | 10/24 10:30 |
| TS Alberto         | 2006 | 06/10 06:00 | 06/19 12:00 | 06/13 16:30 |
| Hurricane Ernesto  | 2006 | 08/24 18:00 | 09/04 12:00 | 08/30 03:00 |
| TS Barry           | 2007 | 05/31 00:00 | 06/05 18:00 | 06/02 14:00 |
| TS Erin            | 2007 | 08/15 00:00 | 08/20 00:00 | 08/16 10:30 |
| TS Gabrielle       | 2007 | 09/08 00:00 | 09/11 12:00 | 09/09 15:30 |
| Hurricane Humberto | 2007 | 09/12 06:00 | 09/14 18:00 | 09/13 07:00 |
| Hurricane Dolly    | 2008 | 07/20 12:00 | 07/27 06:00 | 07/23 18:20 |
| TS Edouard         | 2008 | 08/03 12:00 | 08/07 00:00 | 08/05 12:00 |
| TS Fay             | 2008 | 08/15 12:00 | 08/28 12:00 | 08/18 20:30 |
| Hurricane Gustav   | 2008 | 08/25 00:00 | 09/05 18:00 | 09/01 15:00 |
| Hurricane Hanna    | 2008 | 08/28 00:00 | 09/08 18:00 | 09/06 07:20 |
| Hurricane Ike      | 2008 | 09/01 06:00 | 09/15 18:00 | 09/13 07:00 |
| TS Claudette       | 2009 | 08/16 06:00 | 08/18 00:00 | 08/17 05:30 |
| Hurricane Ida      | 2009 | 11/04 06:00 | 11/11 12:00 | 11/10 12:00 |
| TS Bonnie          | 2010 | 07/22 06:00 | 07/26 00:00 | 07/23 14:30 |
| TS Hermine*        | 2010 | 09/04 18:00 | 09/10 06:00 | 09/07 02:00 |
| TS Don             | 2011 | 07/27 06:00 | 07/30 12:00 | 07/30 02:30 |
| Hurricane Irene    | 2011 | 08/21 00:00 | 08/30 06:00 | 08/27 12:00 |
| TS Lee             | 2011 | 09/02 00:00 | 09/07 00:00 | 09/04 10:30 |
| TS Beryl           | 2012 | 05/25 12:00 | 06/02 06:00 | 05/28 04:10 |
| TS Debby           | 2012 | 06/23 12:00 | 06/27 18:00 | 06/26 21:00 |
| Hurricane Isaac    | 2012 | 08/20 12:00 | 09/01 12:00 | 08/29 00:00 |
| Hurricane Sandy    | 2012 | 10/21 18:00 | 10/31 18:00 | 10/29 23:30 |
| TS Andrea          | 2013 | 06/05 18:00 | 06/09 00:00 | 06/06 22:00 |

|                   |      |             |             |             |
|-------------------|------|-------------|-------------|-------------|
| Hurricane Arthur  | 2014 | 06/28 18:00 | 07/10 00:00 | 07/04 03:15 |
| TS Ana            | 2015 | 05/06 06:00 | 05/13 00:00 | 05/10 10:00 |
| TS Bill           | 2015 | 06/16 00:00 | 06/21 06:00 | 06/16 16:45 |
| TS Bonnie         | 2016 | 05/27 06:00 | 06/10 00:00 | 05/29 12:30 |
| TS Colin          | 2016 | 06/05 12:00 | 06/09 00:00 | 06/07 02:00 |
| Hurricane Hermine | 2016 | 08/28 18:00 | 09/09 00:00 | 09/02 05:30 |
| TS Julia          | 2016 | 09/13 06:00 | 09/21 12:00 | 09/13 06:00 |
| Hurricane Matthew | 2016 | 09/28 12:00 | 10/10 00:00 | 10/08 15:00 |
| TS Cindy          | 2017 | 06/19 18:00 | 06/24 12:00 | 06/22 07:00 |
| TS Emily          | 2017 | 07/30 18:00 | 08/02 06:00 | 07/31 14:45 |
| Hurricane Harvey  | 2017 | 08/16 06:00 | 09/02 18:00 | 08/26 03:00 |
| Hurricane Irma    | 2017 | 08/30 00:00 | 09/13 18:00 | 09/10 13:00 |
| Hurricane Nate    | 2017 | 10/03 12:00 | 10/11 06:00 | 10/08 00:00 |

\* TS Hermine actually made landfall on the coast of northeastern Mexico, close to the Texas boarder.

## References

Lin, Y. and Mitchell, K. E. (2005). “The NCEP stage II/IV hourly precipitation analyses: Development and applications”. In: *19th Conf. Hydrology, American Meteorological Society, San Diego, CA, USA*.
